# Supplementary material
Source: PubMed Central journal article supplement (PMC3773755)
Supplement: 1302159110_pnas.201302159SI.pdf [file 1302159110_pnas.201302159SI.pdf]

# Supporting Information

Partanen et al. 10.1073/pnas.1302159110

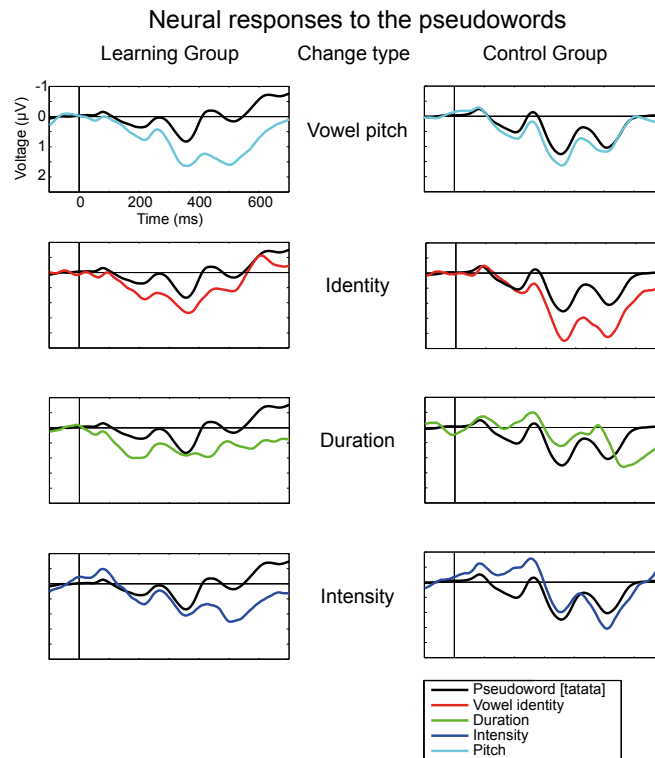

**Fig. S1.** Neural responses to the frequently presented pseudoword [tatata] (black lines;  $P = 0.5$ ) and infrequent changes (colored lines;  $P = 0.1$ , except for pitch changes,  $P = 0.2$ ) in the learning group (left column) and the control group (right column).
